# Supplementary material
Source: HighWire-hosted journal article supplement (https://cmaj.ca/highwire/filestream/149753/field_highwire_adjunct_files/1/221785-res-2-at.pdf)
Supplement: 221785-res-2-at.pdf [file 221785-res-2-at.pdf]

## Appendix B. Model Validation

To ensure that SiMMDep was functioning correctly and producing results as expected, we carried out several forms of model validation (face, internal, cross-validity) and numerous checks within each facet.

### Face validity

**Table B1. Face validity assessments in the SiMMDep model**

| Module              | Item                                                                                                                                                                                                                                                                                                                                                                                                      |
|---------------------|-----------------------------------------------------------------------------------------------------------------------------------------------------------------------------------------------------------------------------------------------------------------------------------------------------------------------------------------------------------------------------------------------------------|
| Disease progression | The number of patients who are alive at the beginning of each year was equal to the sum of patients in different health states                                                                                                                                                                                                                                                                            |
| Cost & QALY         | Total cost is equal to the sum of components<br>Setting utility and disutility to zero, resulted in zero QALY<br>Setting utility to one and disutility to zero, resulted in equal LY and QALY<br>Setting discount and mortality to zero, resulted in LY to be equal to the number of patients at the beginning of the year<br>Increasing the value of health utility index values resulted in higher QALY |
| Mortality           | Setting mortality risk ratios to 1.00 and ensuring mortality matched the background mortality by age and sex                                                                                                                                                                                                                                                                                              |

### Internal validity

We conducted internal validation in 1) patient and 2) cohort base levels. In the patient level, we followed patients with different characteristics individually and assessed whether the model assigned the correct input parameters to them (e.g., health utility index values, costs, mortality probability). At the cohort level, we extracted different outcomes from the model and examined whether the model produced results that matched the patterns observed in input data sources.

**Table B2. Internal validity assessments in the SiMMDep model**

| Module       | Item                                                                                           | Target for Validation                           | Note                                                                         |
|--------------|------------------------------------------------------------------------------------------------|-------------------------------------------------|------------------------------------------------------------------------------|
| Entry Cohort | Number of newly diagnosed and prevalent patients (eligible for pharmacotherapy) entering model | MSP <sup>1</sup> , DAD <sup>2</sup> (2015-2020) | Slightly higher than the target from 2020, considering the population growth |
| Demographic  | The number of patients with                                                                    | Ferrari et al., 2013 <sup>3</sup> and           |                                                                              |

---

|                                                                                                          |                                                                                           |
|----------------------------------------------------------------------------------------------------------|-------------------------------------------------------------------------------------------|
| different MDD severity was consistent with the input parameters                                          | Kessing et al., 2008 <sup>4</sup>                                                         |
| Distribution of current age of entry cohort by sex (newly diagnosed and prevalent patients)              | MSP <sup>1</sup> , DAD <sup>2</sup> , and MSP Consolidation File <sup>5</sup> (2015-2020) |
| Distribution of age of onset of prevalent patients in the entry cohort by sex                            | MSP <sup>1</sup> , DAD <sup>2</sup> , and MSP Consolidation File <sup>5</sup> (2015-2020) |
| Ratio of female patients in the incident and prevalent cohort                                            | MSP <sup>1</sup> , DAD <sup>2</sup> , and MSP Consolidation File <sup>5</sup> (2015-2020) |
| Ratio of MDD patients (prevalent and newly diagnosed) with psychiatric comorbidities at the entry cohort | MSP <sup>1</sup> and DAD <sup>2</sup> (2015-2020)                                         |
| Ratio of prevalent MDD patients with a history of previous severe MDD episodes                           | Kessing et al., 2008 <sup>4</sup>                                                         |
| Distribution of geographic ancestry                                                                      | Statistics Canada <sup>6</sup>                                                            |
| Distribution of metabolizer phenotypes (CYP2C19) by geographic ancestry                                  | Bousman et. al, 2021 <sup>7</sup> and PharmGKB <sup>8-10</sup>                            |
| Distribution of metabolizer phenotypes (CYP2D6) by geographic ancestry                                   | Bousman et. al, 2021 <sup>7</sup> and PharmGKB <sup>8-10</sup>                            |

---

|                                     |                                                                                                      |                                                          |
|-------------------------------------|------------------------------------------------------------------------------------------------------|----------------------------------------------------------|
| Treatment and adverse effect module | Distribution of treatment trials for prevalent MDD patients at the time of entering model            | PharmaNet <sup>11</sup> (2015-2020)                      |
|                                     | Medication selection based on CYP2C19 metabolizer phenotypes                                         | Sequence2Script tool <sup>12</sup>                       |
|                                     | Medication selection based on CYP2D6 metabolizer phenotypes                                          | Sequence2Script tool <sup>12</sup>                       |
|                                     | Distribution of medications for newly diagnosed and prevalent patients at the first medication trial | PharmaNet <sup>11</sup> (2015-2020)                      |
|                                     | Distribution of medications for prevalent patients at the third medication trial                     | PharmaNet <sup>11</sup> (2015-2020)                      |
|                                     | Medication-medication interaction                                                                    | Lexi-Interact Database <sup>13</sup>                     |
|                                     | Number of recurrences of untreated patients at week 52 and distribution of MDD severity level        | Calculated based on Hardeveld et al., 2013 <sup>14</sup> |
|                                     | Risk of recurrence for newly diagnosed patients with low risk of recurrence at week 52               | Calculated based on Hardeveld et al., 2013 <sup>14</sup> |
|                                     | Risk of recurrence for prevalent patients with low risk of recurrence at week 52                     | Calculated based on Hardeveld et al., 2013 <sup>14</sup> |

|                                                                     |                                                                                                                                                               |
|---------------------------------------------------------------------|---------------------------------------------------------------------------------------------------------------------------------------------------------------|
| Risk of recurrence for high risk prevalent patients at week 116     | Calculated based on Hardeveld et al., 2013 <sup>14</sup>                                                                                                      |
| Recurrence rate in the “Well” health state                          | Hardeveld et al., 2013 <sup>14</sup>                                                                                                                          |
| Probability of full remission with and without PGx testing          | Cipriani et al., 2018 <sup>15</sup> and Bunka et al., 2023 <sup>16</sup>                                                                                      |
| Probability of discontinuation with and without PGx testing         | Cipriani et al., 2018 <sup>15</sup> and Bunka et al., 2023 <sup>16</sup>                                                                                      |
| Number of patients in the “Well” health state who are on medication | Clinical experts                                                                                                                                              |
| Number of PGx tests in the intervention arm                         | Calculation based on number of patients who are eligible to receive PGx testing in different branches of the treatment trials based on the base-case scenario |

---

|                 |                                                                           |                              |                                                                                                                                                                                  |
|-----------------|---------------------------------------------------------------------------|------------------------------|----------------------------------------------------------------------------------------------------------------------------------------------------------------------------------|
| Hospitalization | Rate of hospitalization (incidence, prevalence, “Well” state, refractory) | DAD <sup>2</sup> (2015-2020) | Number of hospital admissions divided by number of patients (incidence, prevalence, well state, refractory) at the beginning of year and the number matched the input parameters |
|-----------------|---------------------------------------------------------------------------|------------------------------|----------------------------------------------------------------------------------------------------------------------------------------------------------------------------------|

---

|               |                                                                                   |                                                                                                                                                               |                                                                                                                                                                                 |
|---------------|-----------------------------------------------------------------------------------|---------------------------------------------------------------------------------------------------------------------------------------------------------------|---------------------------------------------------------------------------------------------------------------------------------------------------------------------------------|
| Cost and QALY | Direct medical cost of death due to suicide                                       | Vasiliadis et al., 2015 <sup>17</sup>                                                                                                                         | Cost of direct medical cost of death due to suicide divided by number of death due to suicide was equal to the unit cost in each calendar year                                  |
|               | Cost of hospitalization for incidence, prevalence, “Well” and refractory patients | DAD <sup>2</sup> (2015-2020) and Estimated using CIHI 2021 <sup>18</sup>                                                                                      | Cost of hospitalization divided by the number of hospital admissions was equal to the unit cost for incidence, prevalence, “Well” and refractory patients in each calendar year |
|               | Cost of ECT<br>Cost of PGx testing                                                | CIHI <sup>19</sup><br>Maruf 2020 <sup>20</sup> and MSC Payment schedule, 2020 <sup>21</sup>                                                                   | Cost of PGx divided by number of PGx tests done in each calendar year was equal to the unit cost of PGx                                                                         |
|               | Cost of assessment and monitoring                                                 | Micro-costing approach based on expert opinions, the MSC payment schedule <sup>21</sup> , and average salary of health care professionals in BC <sup>22</sup> | Total cost of monitoring and assessment divided by patients was equal to the average cost of assessment across different groups                                                 |

---

|           |                             |                                    |
|-----------|-----------------------------|------------------------------------|
| Mortality | Rate of mortality<br>by sex | Statistics<br>Canada <sup>23</sup> |
|-----------|-----------------------------|------------------------------------|

---

**Note:** MSP = Medical Service Plan; DAD = Discharge Abstract Database.

### **Cross-validity**

We compared the model's cost-effectiveness outcome of PGx testing for MDD with a recent Canadian health technology assessment (HTA).<sup>24</sup> In the cross-validation, we ran the model for a shorter time horizon and tried to make similar assumptions (e.g., population, PGx testing price, some of the health utility values, and scenario for delivering PGx). Although we achieved similar results in this cross-validation, our assumptions are well-justified and we contend that it is essential to model long-term outcomes with this type of recurrent mental health condition.

## References

1. British Columbia Ministry of Health [creator] (2021): Medical Services Plan (MSP) Payment Information File. V2. Population Data BC [publisher]. Data Extract. MOH (2021). <http://www.popdata.bc.ca/data>
2. Canadian Institute for Health Information [creator] (2021): Discharge Abstract Database (Hospital Separations). V2. Population Data BC [publisher]. Data Extract. MOH (2021). <http://www.popdata.bc.ca/data>
3. Ferrari AJ CF, Norman RE, Patten SB, Freedman G, Murray CJ "Burden of depressive disorders by country, sex, age, and year: findings from the global burden of disease study 2010". *PLoS Med.* 2013;10(11).
4. Kessing LV. Severity of depressive episodes during the course of depressive disorder. *Br J Psychiatry.* 2008 Apr;192(4):290-3.
5. British Columbia Ministry of Health [creator] (2021): Consolidation File (MSP Registration & Premium Billing). V2. Population Data BC [publisher]. Data Extract. MOH (2021). <http://www.popdata.bc.ca/data>
6. Statistics Canada. Census Profile, 2016 Census, [Internet]. 2016 [Accessed May 15, 2021]. Available from: <https://www12.statcan.gc.ca/census-recensement/2016/dp-pd/prof/details/page.cfm?Lang=E&SearchText=British%20Columbia&SearchType=Begin&SearchPR=01&TABID=1&G=1&Geo1=PR&Code1=01&Geo2=PR&Code2=59&type=1&B1=Ethnic%20origin>.
7. Bousman CA, Bengesser SA, Aitchison KJ, Amare AT, Aschauer H, Baune BT, et al. Review and consensus on pharmacogenomic testing in psychiatry. *Pharmacopsychiatry.* 2021;54(01):5-17.
8. Huddart R, Fohner AE, Whirl-Carrillo M, Wojcik GL, Gignoux CR, Popejoy AB, et al. Standardized Biogeographic Grouping System for Annotating Populations in Pharmacogenetic Research. *Clinical pharmacology and therapeutics.* 2019;105(5):1256-62.
9. Whirl-Carrillo M, McDonagh EM, Hebert JM, Gong L, Sangkuhl K, Thorn CF, et al. Pharmacogenomics knowledge for personalized medicine. *Clinical pharmacology and therapeutics.* 2012;92(4):414-7.
10. Whirl-Carrillo M, Huddart R, Gong L, Sangkuhl K, Thorn CF, Whaley R, et al. An Evidence-Based Framework for Evaluating Pharmacogenomics Knowledge for Personalized Medicine. *Clinical pharmacology and therapeutics.* 2021;110(3):563-72.
11. British Columbia Ministry of Health [creator] (2021): PharmaNet. V2. British Columbia Ministry of Health [publisher]. Data Extract. Data Stewardship Committee (2021). <http://www.popdata.bc.ca/data>
12. Bousman CA, Wu P, Aitchison KJ, Cheng T. Sequence2Script: A Web-Based Tool for Translation of Pharmacogenetic Data Into Evidence-Based Prescribing Recommendations. *Frontiers in pharmacology.* 2021;12:636650-.
13. CPS [Internet]. Ottawa (ON): Canadian Pharmacists Association; 2016 [Accessed December 1 2020]. Available from: <http://www.e-cps.ca>.
14. Hardeveld F, Spijker J, De Graaf R, Nolen WA, Beekman AT. Recurrence of major depressive disorder and its predictors in the general population: results from the Netherlands Mental Health Survey and Incidence Study (NEMESIS). *Psychol Med.* 2013 Jan;43(1):39-48.
15. Cipriani A, Furukawa TA, Salanti G, Chaimani A, Atkinson LZ, Ogawa Y, et al. Comparative efficacy and acceptability of 21 antidepressant drugs for the acute treatment of adults with major depressive disorder: a systematic review and network meta-analysis. *Focus.* 2018;16(4):420-9.

16. Bunka M, Wong G, Kim D, Edwards L, Austin J, Doyle-Waters MM, et al. Evaluating treatment outcomes in pharmacogenomic-guided care for major depression: A rapid review and meta-analysis. *Psychiatry research*. 2023:115102.
17. Vasiliadis H-M, Lesage A, Latimer E, Seguin M. Implementing Suicide Prevention Programs: Costs and Potential Life Years Saved in Canada. *The journal of mental health policy and economics*. 2015;18(3):147-55.
18. CIHI. Inpatient Hospitalization, Surgery and Newborn Statistics [Internet]. 2019-2020 [Accessed Sep 16, 2022]. Available from: <https://www.cihi.ca/sites/default/files/document/dad-hmdb-childbirth-2020-2021-data-tables-en.xlsx>.
19. CIHI. Patient cost estimator [Internet]. Ottawa, ON: CIHI; 2016 [Accessed Aug 31]. Available from: <https://www.cihi.ca/en/patient-cost-estimator>.
20. Maruf AA, Fan M, Arnold PD, Muller DJ, Aitchison KJ, Bousman CA. Pharmacogenetic Testing Options Relevant to Psychiatry in Canada: Options de tests pharmacogenétiques pertinents en psychiatrie au Canada. *Can J Psychiatry*. 2020 Aug;65(8):521-30.
21. BC Government. MSC Payment Schedule - Updated Nov 1st, 2020. 2020.
22. Health employers association of BC. Knowledge Management Estimated Annual Compensation for Select Occupation Groups: 2020 [Internet]. [Accessed Sep 27, 2022]. Available from: <https://www.heabc.bc.ca/Page26.aspx#.YzI7kHbMK70>.
23. Statistics Canada. Life expectancy and other elements of the complete life table, three-year estimates, Canada, all provinces except Prince Edward Island [Internet]. 2022 [Accessed Sep 22, 2022]. Available from: <https://www150.statcan.gc.ca/t1/tb11/en/tv.action?pid=1310011401>.
24. Ontario Health. Multi-gene pharmacogenomic testing that includes decision-support tools to guide medication selection for major depression: a health technology assessment. *Ontario Health Technology Assessment Series*. 2021 August 2021;21(13):1-214.
